# Supplementary material for: Add-on Ayurveda Treatment for Early Stage COVID-19: A Single Center Retrospective Cohort Study From Gujarat, India
Source: PubMed Central journal article supplement — J Evid Based Integr Med. 2021 May 31;26:2515690X211020685. doi: 10.1177/2515690X211020685 (PMC8170329; doi:10.1177/2515690x211020685), 2021-05-31
Supplement: sj-pdf-1-chp-10.1177_2515690X211020685.pdf [file sj-pdf-1-chp-10.1177_2515690X211020685.pdf]

**Ingredients and traditional uses of Ayurveda drugs/formulations (selected and used by State AYUSH directorate, Gandhinagar, Gujarat, India) as prophylactic Ayurveda treatment for COVID-19 asymptomatic/mild cases.**

| Name of Ayurveda drugs     | Ingredients                                                                                                                                                                                                                                                                                                                                                                                                                                                                                                                                                                                                                                         | Traditional actions/uses                                      | References |
|----------------------------|-----------------------------------------------------------------------------------------------------------------------------------------------------------------------------------------------------------------------------------------------------------------------------------------------------------------------------------------------------------------------------------------------------------------------------------------------------------------------------------------------------------------------------------------------------------------------------------------------------------------------------------------------------|---------------------------------------------------------------|------------|
| <i>Dashamula</i> decoction | Equal quantity of following ten herbs:<br>1. <i>Bilva</i> ( <i>Aegle marmelos</i> (L.) Corrêa)<br>2. <i>Agnimantha</i> ( <i>Clerodendrum phlomidis</i> L.f.)<br>3. <i>Shyonaka</i> ( <i>Oroxylum indicum</i> (L.) Kurz)<br>4. <i>Patala</i> ( <i>Stereospermum chelonoides</i> (L.f.) DC)<br>5. <i>Gambhari</i> ( <i>Gmelina arborea</i> Roxb.)<br>6. <i>Shalaparni</i> ( <i>Desmodium gangeticum</i> (L.) DC.)<br>7. <i>Kantakari</i> ( <i>Solanum surattense</i> Burm. f.)<br>8. <i>Gokshura</i> ( <i>Tribulus terrestris</i> L.)<br>9. <i>Brihati</i> ( <i>Solanum indicum</i> L.)<br>10. <i>Prishnaparni</i> ( <i>Uraria picta</i> (Jacq.) DC.) | Fever, Cough, Dyspnoea, Intercostal neuralgia                 | 1          |
| <i>Pathyadi</i> decoction  | Equal quantity of following herbs:<br>1. <i>Haritaki</i> ( <i>Terminalia chebula</i> Retz.),<br>2. <i>Bibhitaki</i> ( <i>Terminalia bellirica</i> (Gaertn.) Roxb.),<br>3. <a href="#"><i>Amalaki</i> (<i>Phyllanthus emblica</i> L.)</a> ,<br>4. <i>Bhunimba</i> ( <i>Andrographis paniculata</i> (Burm.f.) Nees),<br>5. <i>Haridra</i> ( <a href="#"><i>Curcuma longa</i> L.</a> ),<br>6. <i>Nimba</i> ( <a href="#"><i>Azadirachta indica</i> A. Juss.</a> )<br>7. <i>Guduchi</i> ( <i>Tinospora sinensis</i> (Lour.) Merr.)                                                                                                                      | Disease of head, Sinusitis                                    | 2, 3       |
| <i>Trikatu</i> powder      | Equal quantity of following herbs:<br>1. <i>Maricha</i> ( <i>Piper nigrum</i> L.),<br>2. <i>Pippali</i> ( <i>Piper longum</i> L.),                                                                                                                                                                                                                                                                                                                                                                                                                                                                                                                  | Digestive impairment, and diseases of nose and throat such as | 1, 4       |

|                                       |                                                                                                                                                                                                                                                                                                             |                                                                                                                               |         |
|---------------------------------------|-------------------------------------------------------------------------------------------------------------------------------------------------------------------------------------------------------------------------------------------------------------------------------------------------------------|-------------------------------------------------------------------------------------------------------------------------------|---------|
|                                       | 3. <i>Sunthi</i> ( <i>Zingiber officinale</i> Roscoe)                                                                                                                                                                                                                                                       | chronic rhinitis/sinusitis, skin diseases, asthma, cough, frequent urination, obesity, and Filariasis                         |         |
| <i>Sansamani</i> tablet               | <i>Guduchi</i> ( <i>Tinospora sinensis</i> (Lour.) Merr.)                                                                                                                                                                                                                                                   | Fevers, diabetes, dyspepsia, jaundice, urinary problems, skin diseases and chronic diarrhoea and dysentery, Immuno-modulatory | 5, 6, 7 |
| AYUSH -64                             | Equal quantity of following herbs:<br>1. <i>Katuki</i> ( <i>Picrorhiza kurroa</i> Royle ex Benth.)<br>2. <i>Lata karanja</i> ( <i>Caesalpinia bonduc</i> (L.) Roxb.)<br>3. <i>Kirattikta</i> ( <i>Swertia chirata</i> Buch.-Ham. ex Wall.)<br>4. <i>Saptaparna</i> ( <i>Alstonia scholaris</i> (L.) R. Br.) | Malarial fever                                                                                                                | 8, 9    |
| <i>Yastimadhu</i> <i>Ghana</i> tablet | <i>Yastimadhu</i> ( <i>Glycyrrhiza glabra</i> L.)                                                                                                                                                                                                                                                           | Cough, sore throat, wound, Immunomodulatory                                                                                   | 6       |

#### References:

1. The Ayurvedic Formulary of India, part 1, (2nd ed.), Dept. of I. S. M. and H., Ministry of Health and Family Welfare, Govt. of India. New Delhi, 2003. pp. 176, 322.
2. The Ayurvedic Formulary of India, part 2. (2nd ed.) Dept. of I. S. M. and H., Ministry of Health and Family Welfare, Govt. of India. 2000. 48.
3. Abraham A, Samuel S, Mathew L. Phytochemical analysis of Pathyashadangam kwath and its standardization by HPLC and HPTLC. J Ayurveda Integr Med. 2020;11(2):153-158. doi:10.1016/j.jaim.2017.10.011
4. Rahul K., Jainendra J, Azhar DK, Pallavi R. Trikatu - A combination of three bioavailability enhancers. International Journal of Green Pharmacy 2018;12(3):437-441
5. Acharya JT. Siddha Yoga Sangraha. Baidyanath Ayurved Bhavan Ltd, Kolkata, 2000. pp. 4
6. The Ayurvedic Pharmacopoeia of India, part 1, vol. 1, Dept. of AYUSH, Ministry of

Health and Family Welfare, Govt. of India. New Delhi, 2001. 54, 168

7. Kirti, S., Mishra N.P., Singh, J., Khanuja S.P.S., 2004. *Tinospora cordifolia* (Guduchi), a reservoir plant for therapeutic applications: A Review. *Indian Journal of Traditional Knowledge*. 3(3), 257-270
8. Shankar, R., Deb, S., Sharma, B.K., 2012. Antimalarial plants of northeast India: An overview. *J Ayurveda Integr Med*. 3 (1),10-16, 10.4103/0975-9476.93940
9. Sharma, K.D., Kapoor, M.L., Vaidya, S.P., Sharma, P.K., 1981. A Clinical Trial of 'AYUSH 64" (A Coded Antimalarial Medicine) in Cases of Malaria, *Jour. Res. Ay. Sid.* 2, 309-326
